# Supplementary material
Source: Springer Nature journal article supplement (https://www.springermedizin.de/resource/supplementary/12905_2014_476_MOESM1_ESM.pdf/9518602)

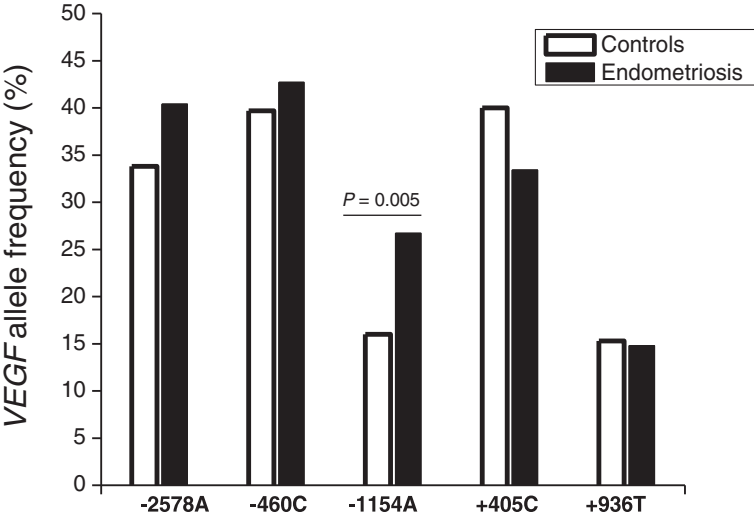

Supplement: MOESM1 [file 9518602]
